# Supplementary material for: Covalently anchored tertiary amine functionalized ionic liquid on silica coated nano-Fe3O4 as a novel, efficient and magnetically recoverable catalyst for the unsymmetrical Hantzsch reaction and Knoevenagel condensation
Source: Royal Society of Chemistry journal article supplement (doi:10.1039/c7ra10692k), 2017-01-01

# Supporting Information

## **Covalently anchored tertiary amine functionalized ionic liquid on silica coated nano-Fe<sub>3</sub>O<sub>4</sub> as a novel, efficient and magnetically recoverable catalyst for the unsymmetrical Hantzsch reaction and Knoevenagel condensation**

Qiang Zhang<sup>1,\*</sup>, Xiao-Ming Ma<sup>2</sup>, Huai-Xin Wei<sup>1</sup>, Xin Zhao<sup>1</sup>, Jun Luo<sup>3</sup>

<sup>1</sup> Jiangsu Key Laboratory of Environmental Functional Materials, School of Chemistry, Biology and Material Engineering, Suzhou University of Science and Technology, Suzhou 215009, China

<sup>2</sup> School of Pharmaceutical Engineering & Life Science, Changzhou University, Changzhou 213164, China

<sup>3</sup> School of Chemical Engineering, Nanjing University of Science & Technology, Nanjing 210094, China

E-mail: zhangqiang005@gmail.com

**Part 1 NMR spectra for the synthesis of BIL**

**Part 2 NMR spectra of the polyhydroquinolines**

**Part 3 NMR spectra for the products of Knoevenagel condensation**

## Part 1 NMR spectrum for the synthesis of BIL

### 1. $^1\text{H}$ NMR spectrum of 1-(2-(1*H*-imidazol-1-yl)ethyl)piperidine (**1**)

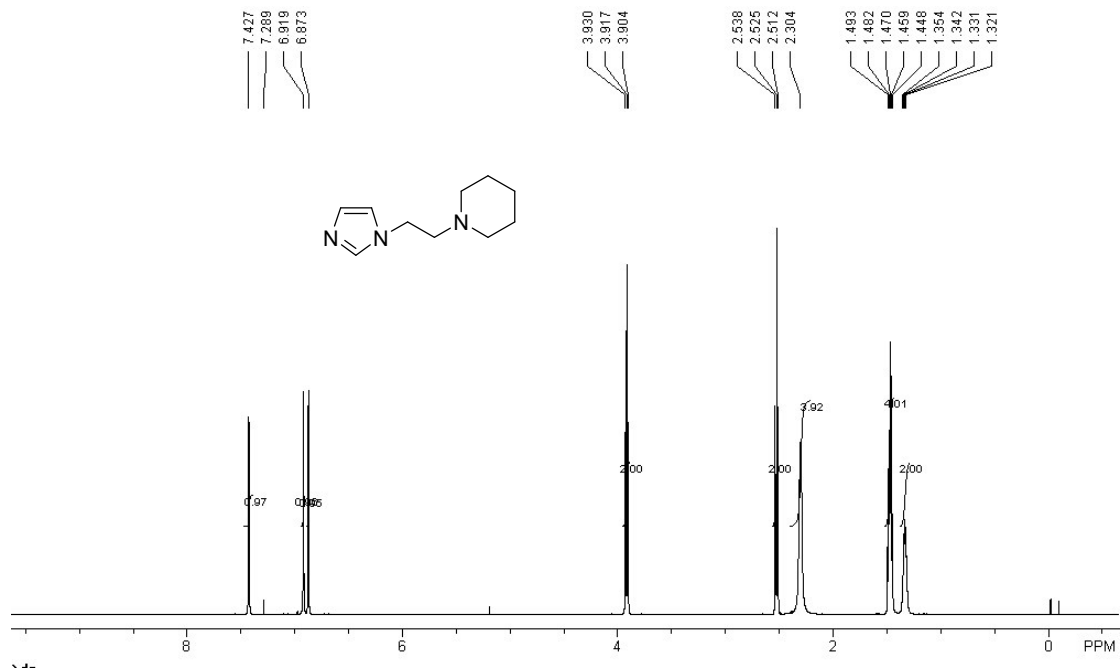

### 2. $^{13}\text{C}$ NMR spectrum of 1-(2-(1*H*-imidazol-1-yl)ethyl)piperidine (**1**)

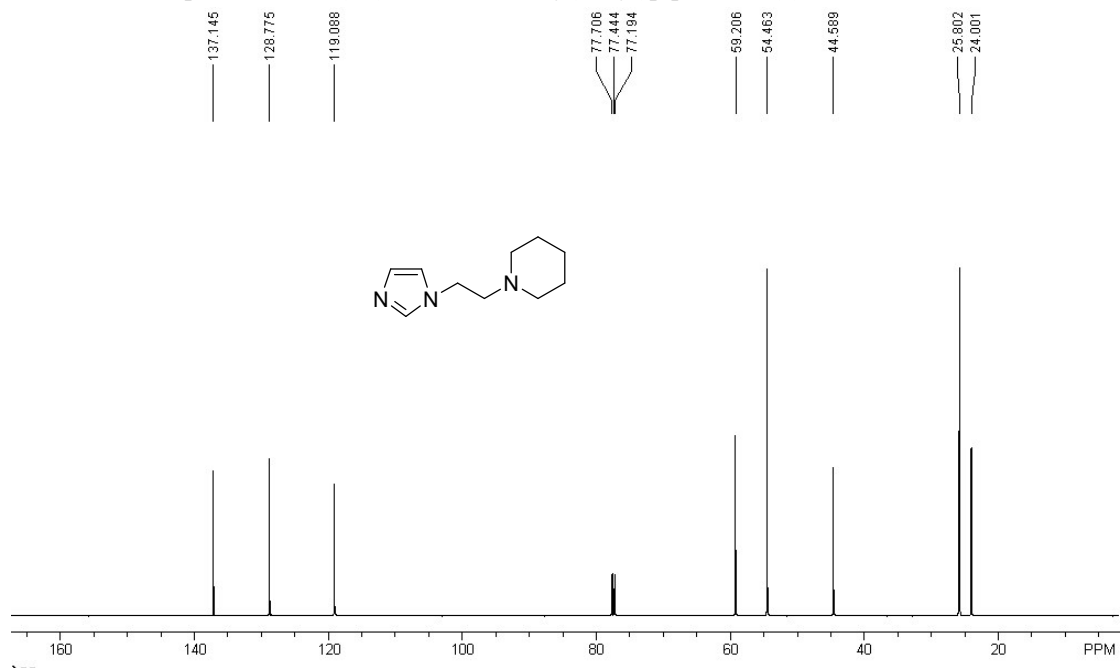

3.  $^1\text{H}$  NMR spectrum of precursor 2 (BIL)

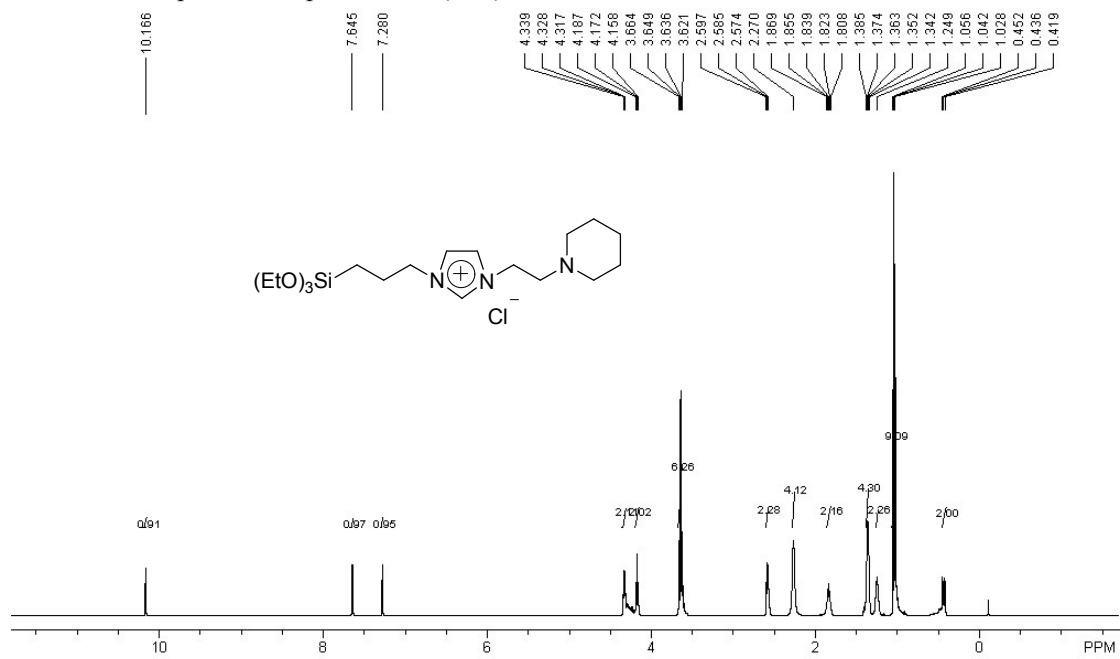

4.  $^{13}\text{C}$  NMR spectrum of precursor 2 (BIL)

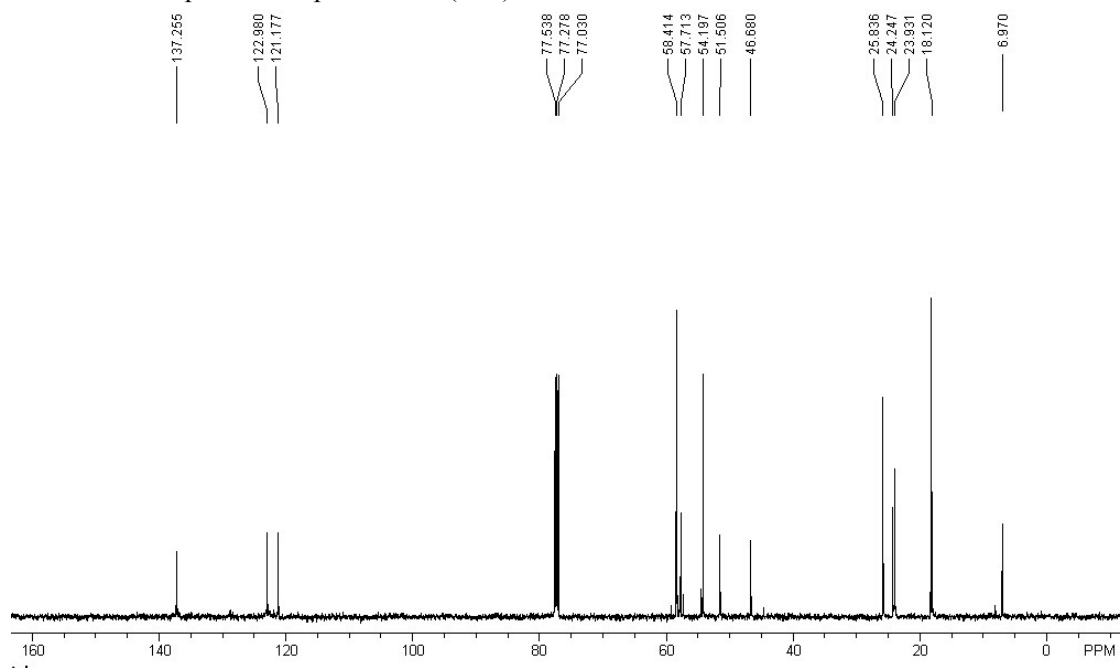

## Part 2 NMR spectrum of the polyhydroquinolines

5.  $^1\text{H}$  NMR spectrum of ethyl 2,7,7-trimethyl-5-oxo-4-phenyl-1,4,5,6,7,8-hexahydroquinoline-3-carboxylate (**4a**)

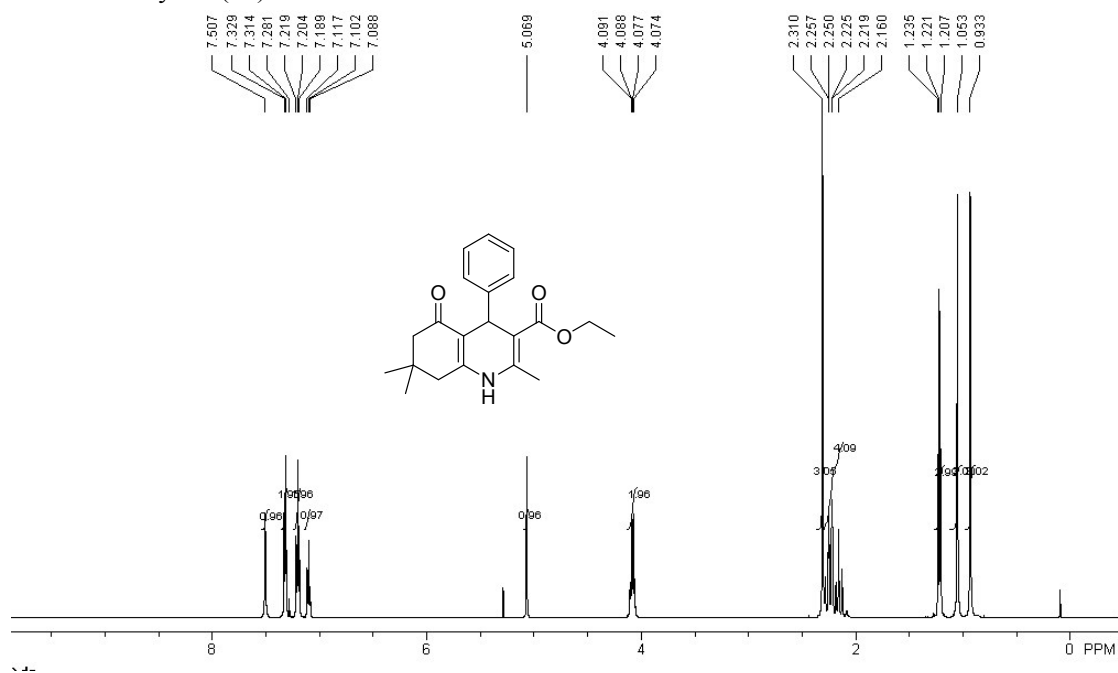

6.  $^1\text{H}$  NMR spectrum of ethyl 2,7,7-trimethyl-5-oxo-4-(p-tolyl)-1,4,5,6,7,8-hexahydroquinoline-3-carboxylate (**4b**)

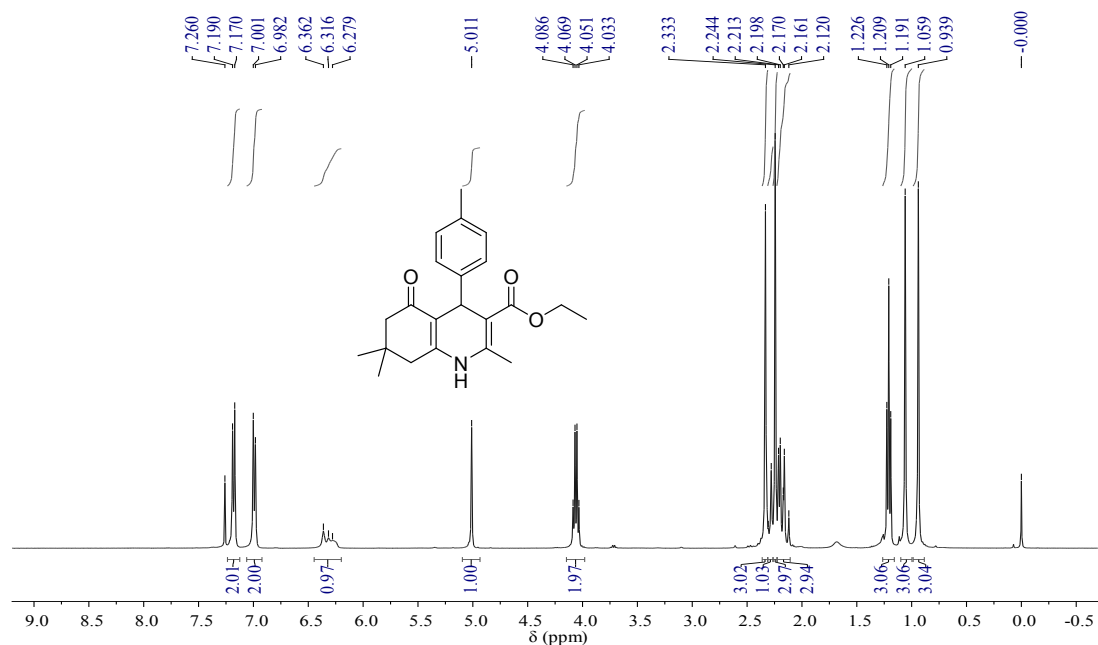

7.  $^1\text{H}$  NMR spectrum of ethyl 4-(4-methoxyphenyl)-2,7,7-trimethyl-5-oxo-1,4,5,6,7,8-hexahydroquinoline-3-carboxylate (**4c**)

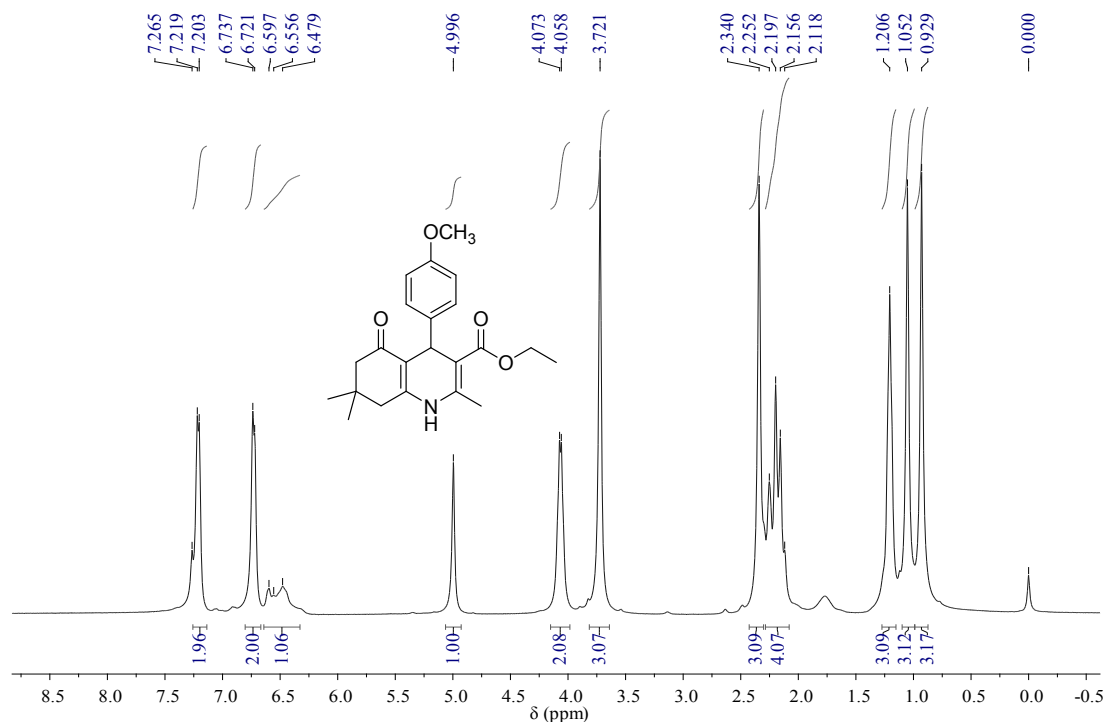

8.  $^1\text{H}$  NMR spectrum of ethyl 4-(4-hydroxyphenyl)-2,7,7-trimethyl-5-oxo-1,4,5,6,7,8-hexahydroquinoline-3-carboxylate (**4d**)

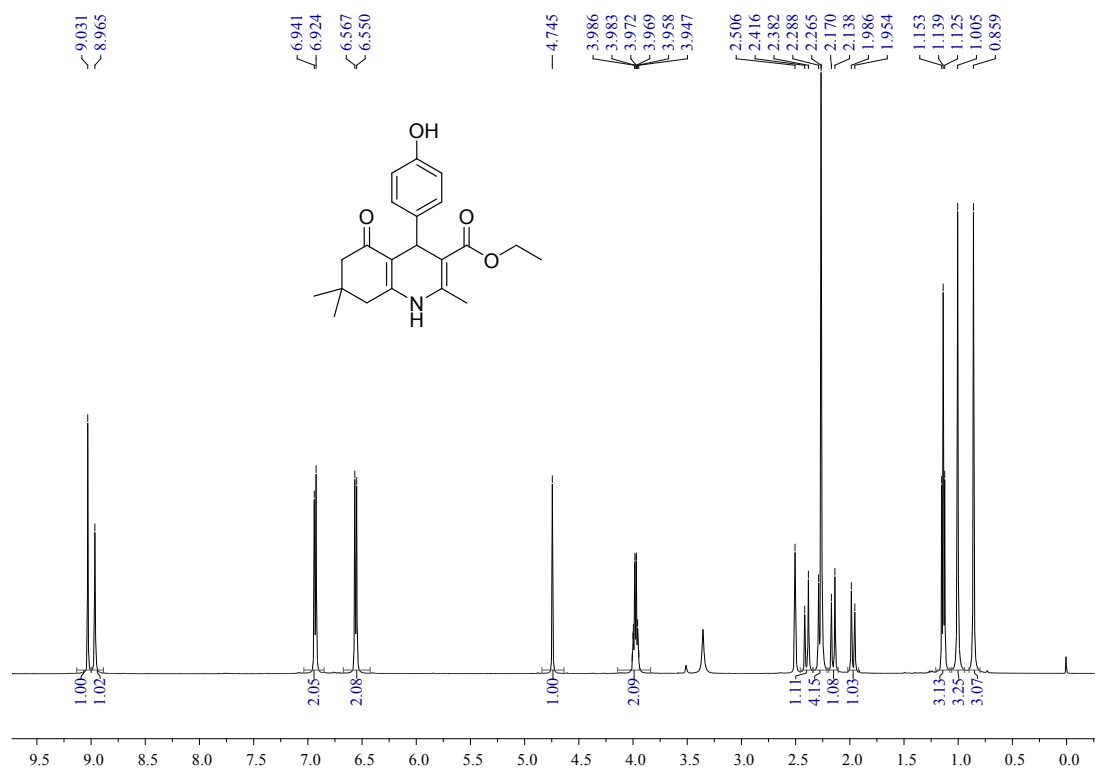

9.  $^1\text{H}$  NMR spectrum of ethyl 4-(4-hydroxy-3-methoxyphenyl)-2,7,7-trimethyl-5-oxo-1,4,5,6,7,8-hexahydroquinoline-3-carboxylate (**4e**)

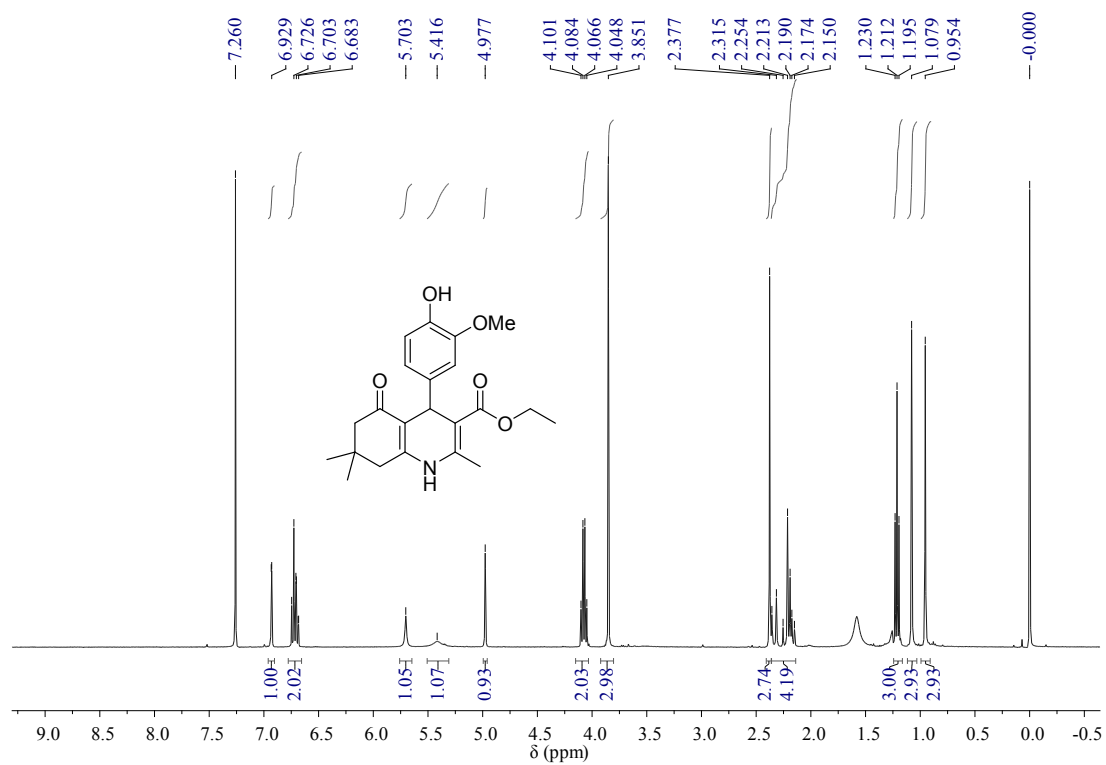

10.  $^1\text{H}$  NMR spectrum of ethyl 2,7,7-trimethyl-4-(3-nitrophenyl)-5-oxo-1,4,5,6,7,8-hexahydroquinoline-3-carboxylate (**4f**)

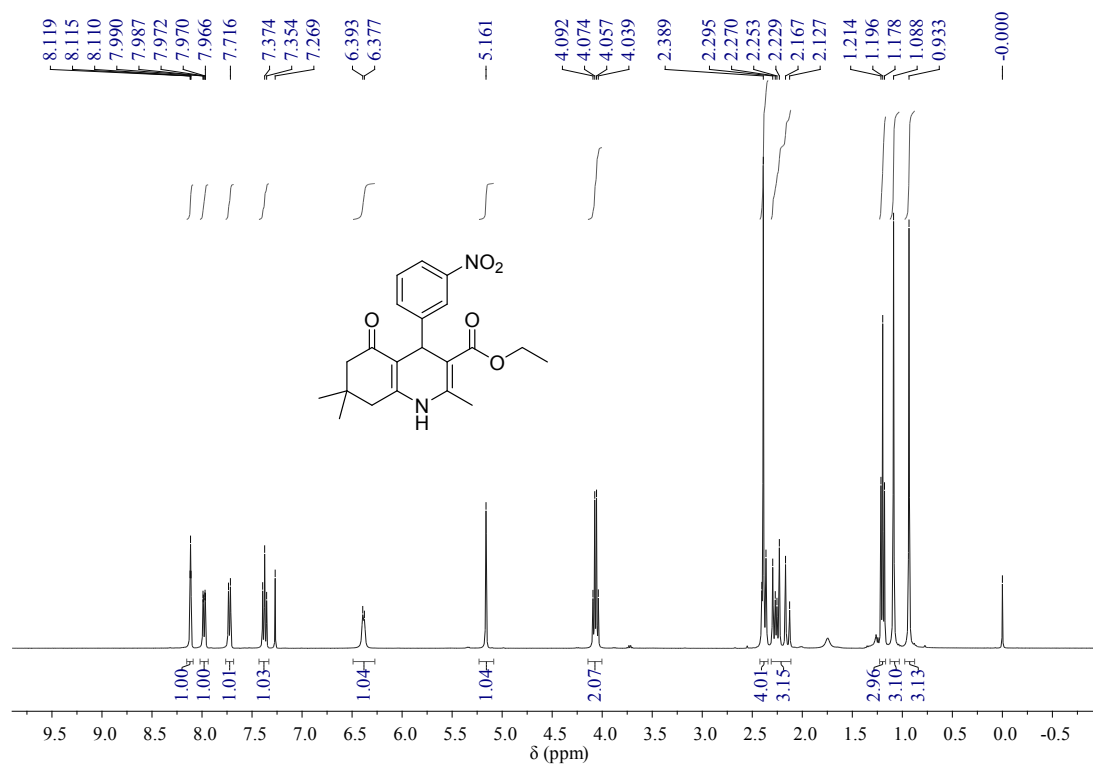

11.  $^1\text{H}$  NMR spectrum of ethyl 2,7,7-trimethyl-4-(4-nitrophenyl)-5-oxo-1,4,5,6,7,8-hexahydroquinoline-3-carboxylate (**4g**)

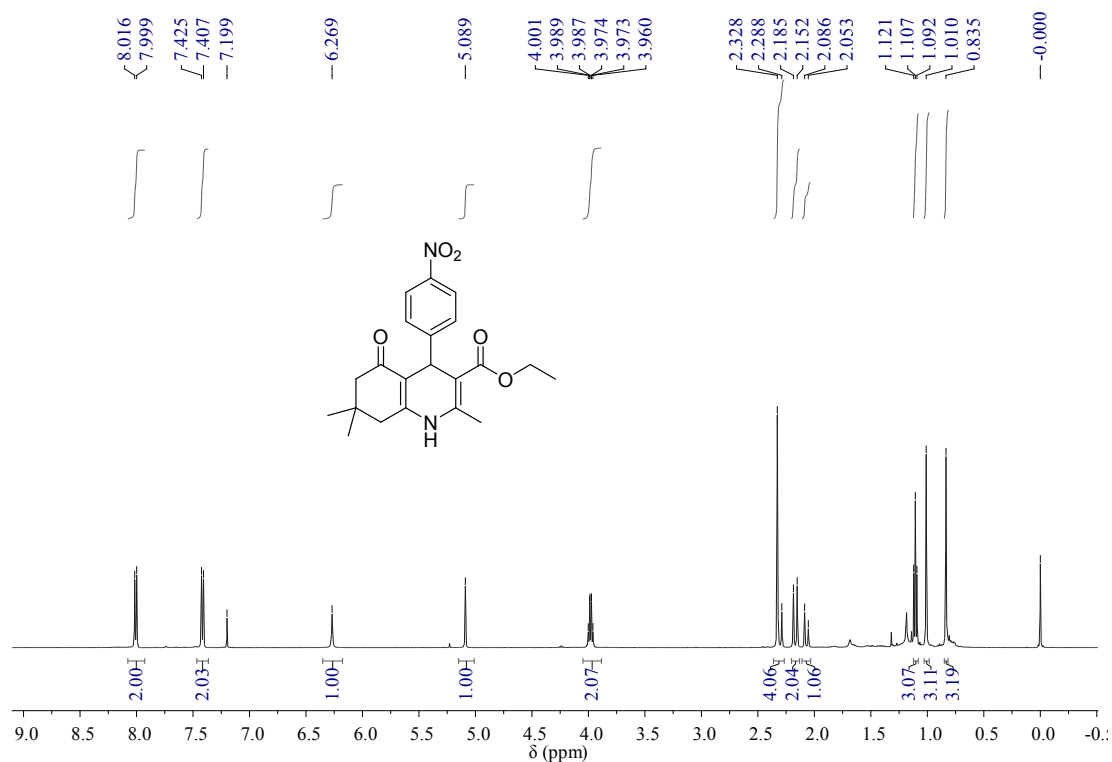

12.  $^1\text{H}$  NMR spectrum of ethyl 4-(4-fluorophenyl)-2,7,7-trimethyl-5-oxo-1,4,5,6,7,8-hexahydroquinoline-3-carboxylate (**4h**)

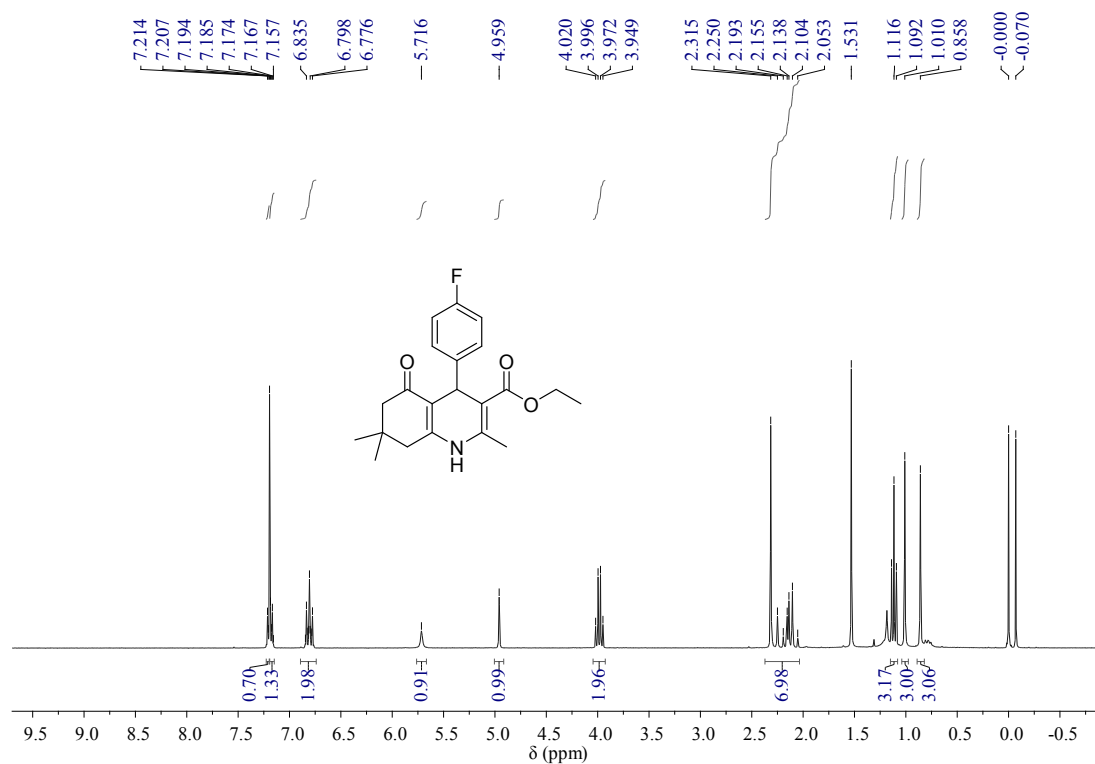

13.  $^1\text{H}$  NMR spectrum of ethyl 4-(4-bromophenyl)-2,7,7-trimethyl-5-oxo-1,4,5,6,7,8-hexahydroquinoline-3-carboxylate (**4i**)

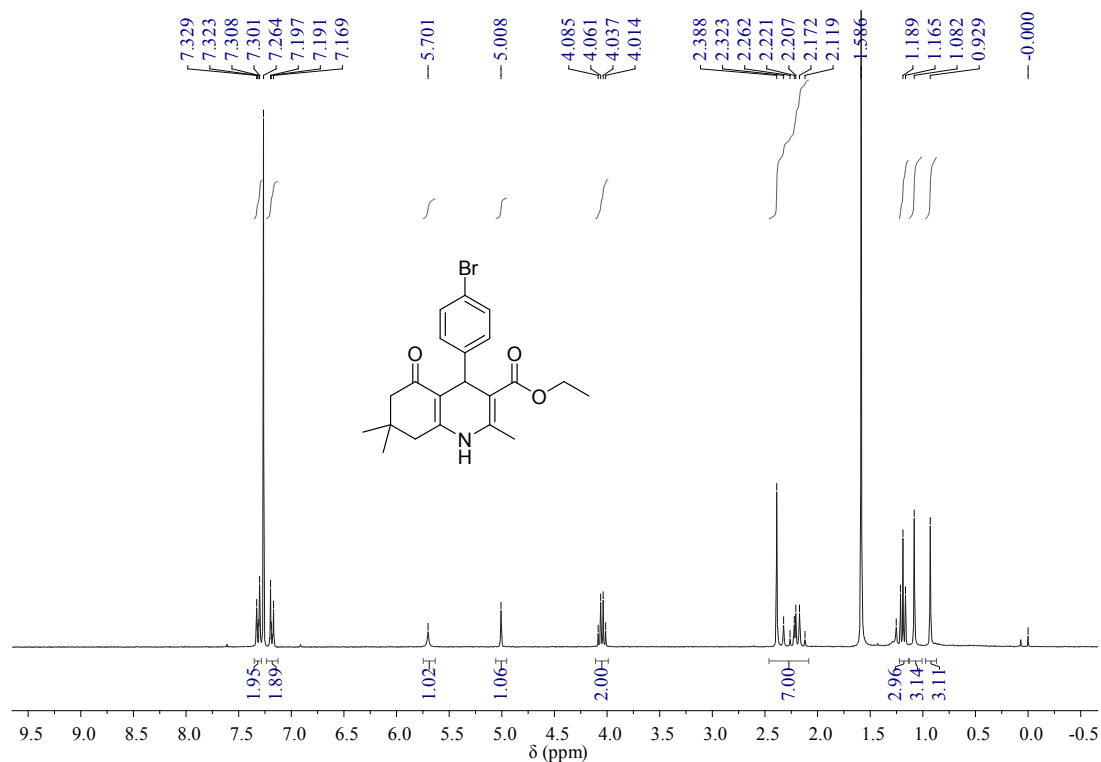

14.  $^1\text{H}$  NMR spectrum of ethyl 4-(3-bromophenyl)-2,7,7-trimethyl-5-oxo-1,4,5,6,7,8-hexahydroquinoline-3-carboxylate (**4j**)

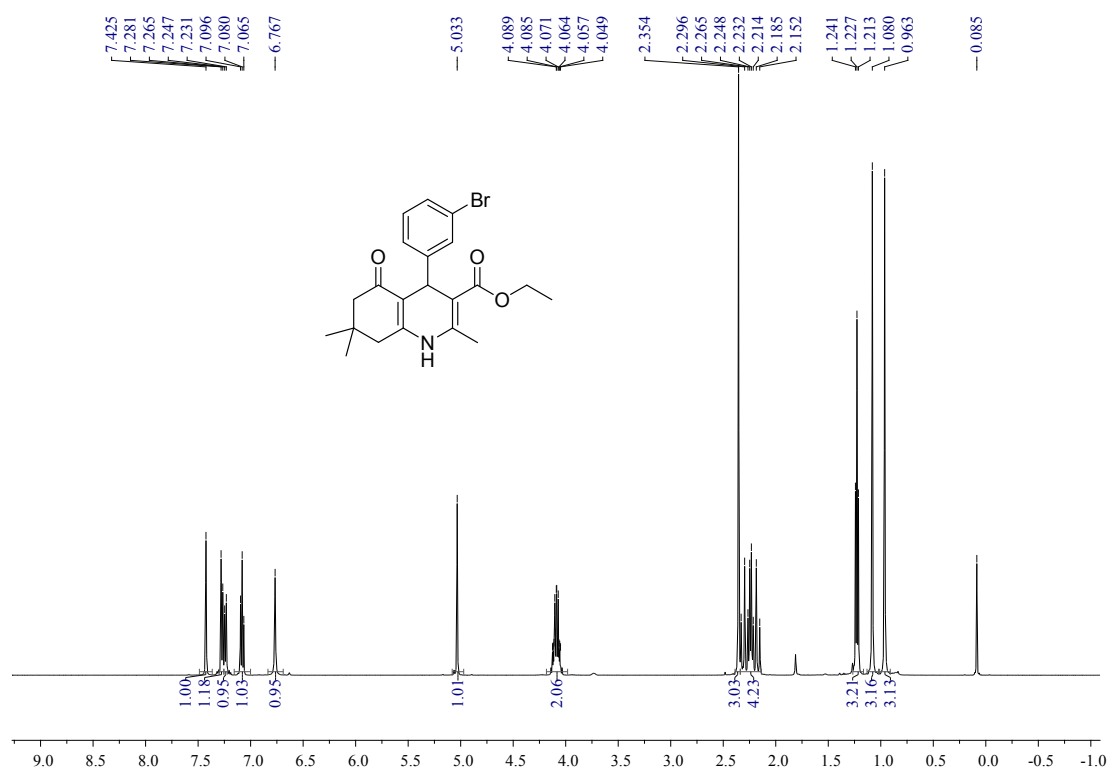



15.  $^1\text{H}$  NMR spectrum of ethyl 4-(2,4-dichlorophenyl)-2,7,7-trimethyl-5-oxo-1,4,5,6,7,8-hexahydroquinoline-3-carboxylate (**4k**)

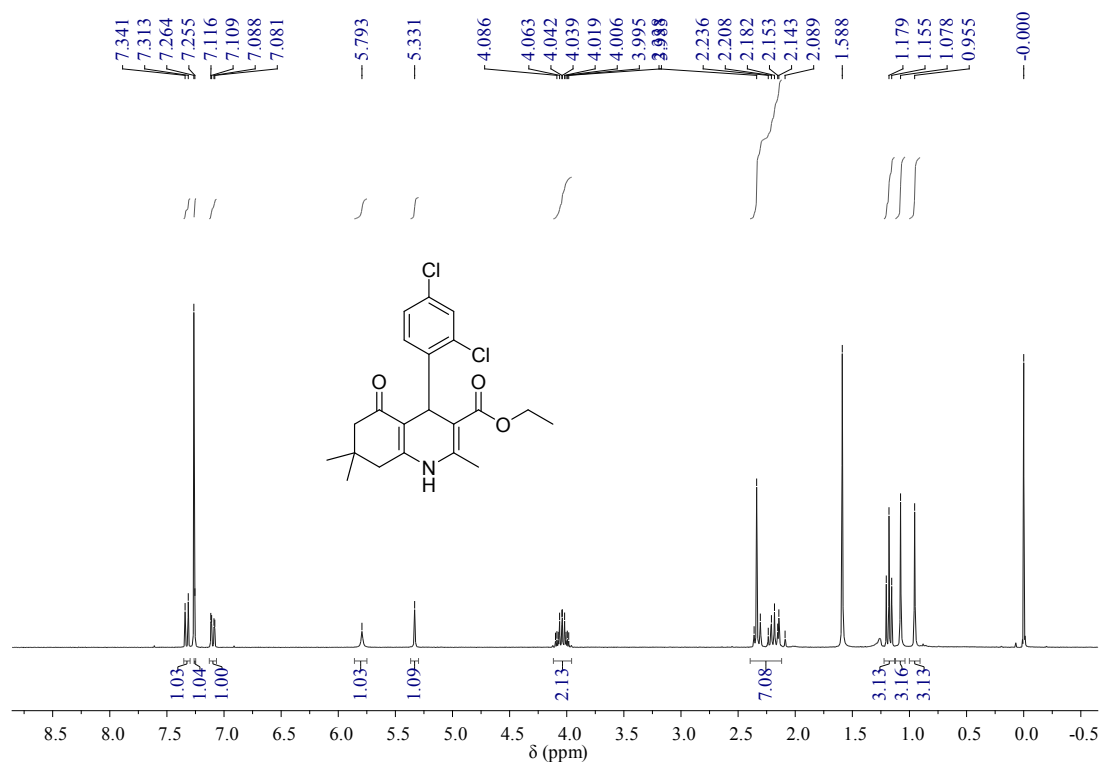

16.  $^1\text{H}$  NMR spectrum of ethyl 4-(3-chlorophenyl)-2,7,7-trimethyl-5-oxo-1,4,5,6,7,8-hexahydroquinoline-3-carboxylate (**4l**)

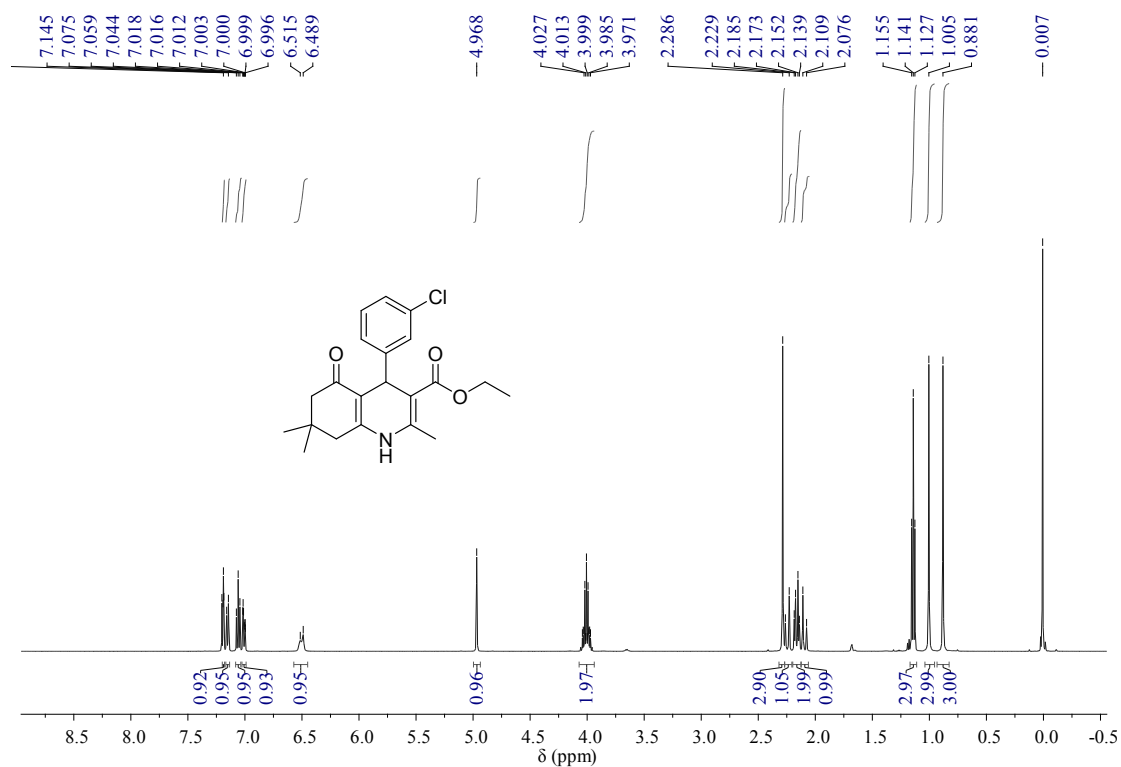

17.  $^1\text{H}$  NMR spectrum of ethyl 4-(4-chlorophenyl)-2,7,7-trimethyl-5-oxo-1,4,5,6,7,8-hexahydroquinoline-3-carboxylate (**4m**)

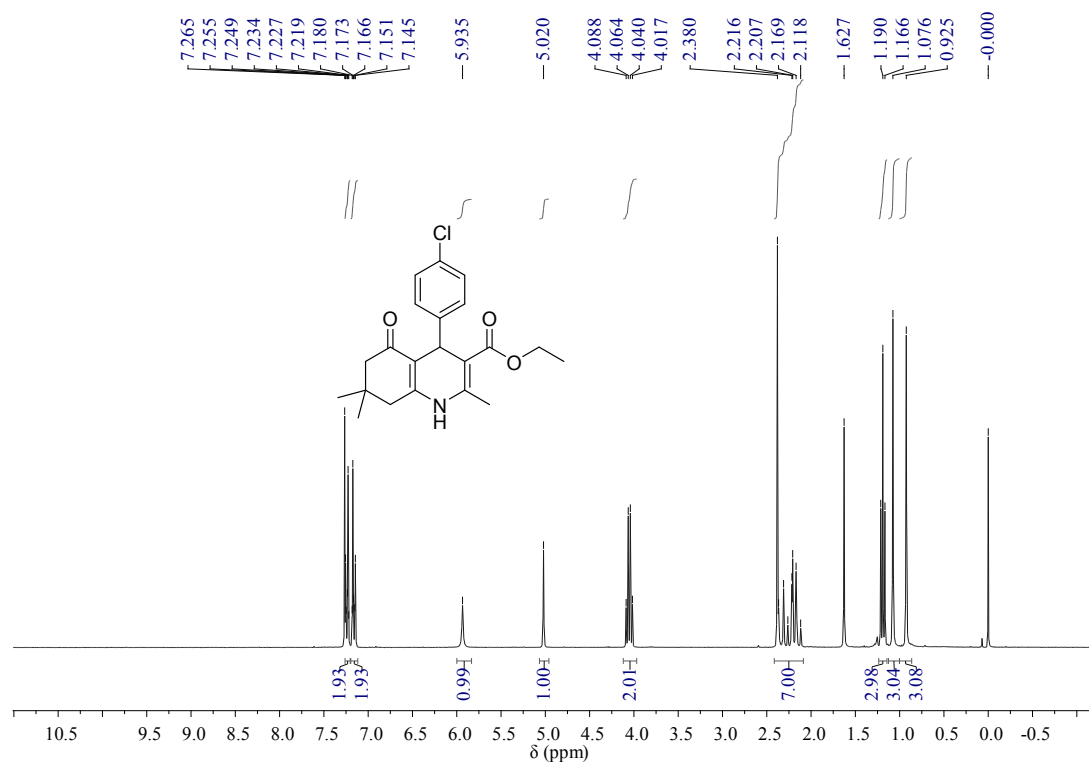

18.  $^1\text{H}$  NMR spectrum of ethyl 2,7,7-trimethyl-5-oxo-4-(thiophen-2-yl)-1,4,5,6,7,8-hexahydroquinoline-3-carboxylate (**4n**)

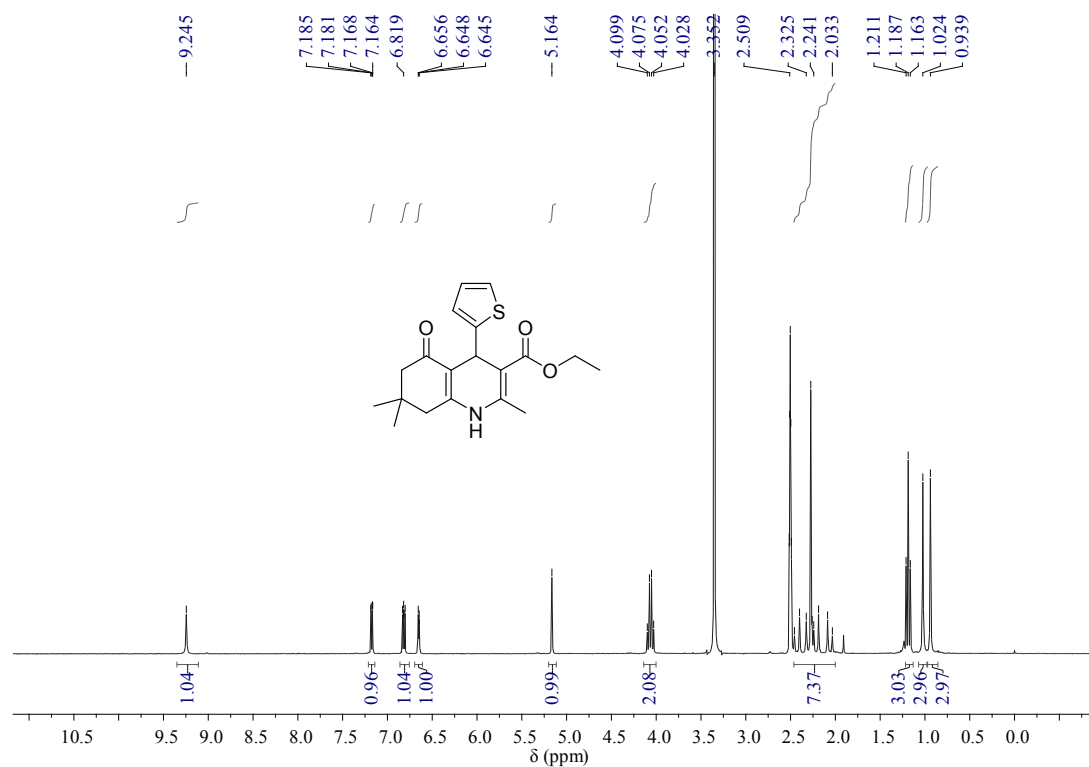

19.  $^1\text{H}$  NMR spectrum of ethyl 4-(furan-2-yl)-2,7,7-trimethyl-5-oxo-1,4,5,6,7,8-hexahydroquinoline-3-carboxylate (**4o**)

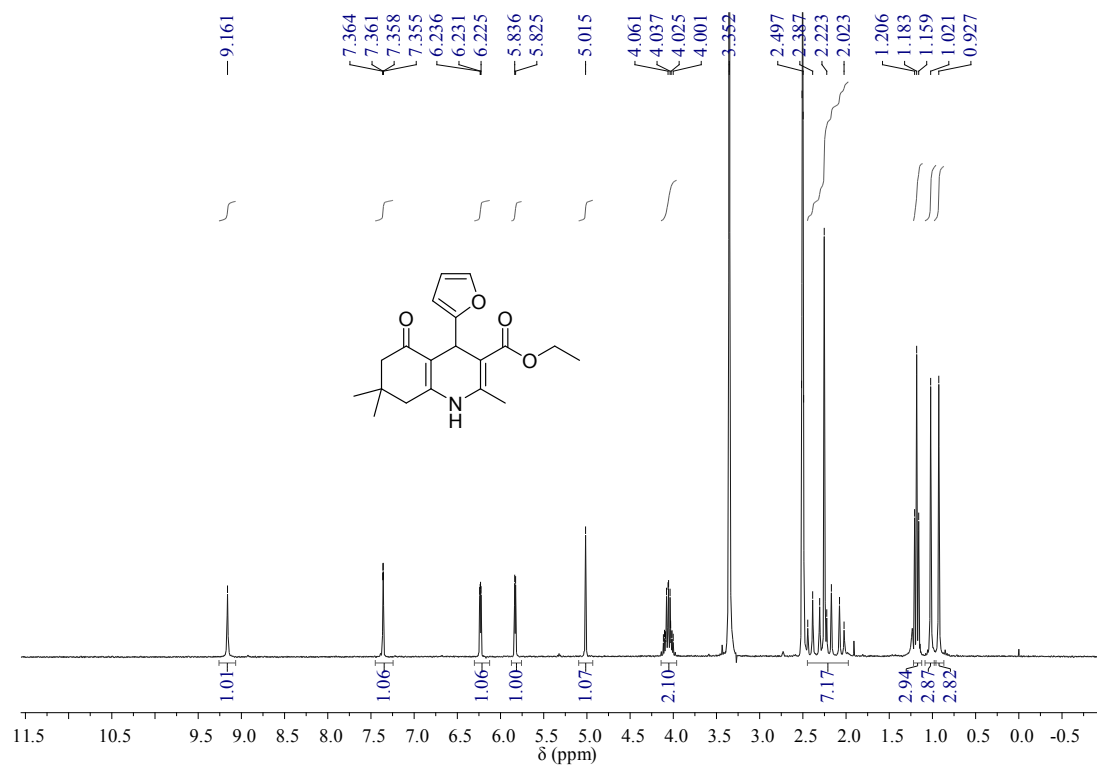

20.  $^1\text{H}$  NMR spectrum of ethyl 2,7,7-trimethyl-5-oxo-4-propyl-1,4,5,6,7,8-hexahydroquinoline-3-carboxylate (**4p**)

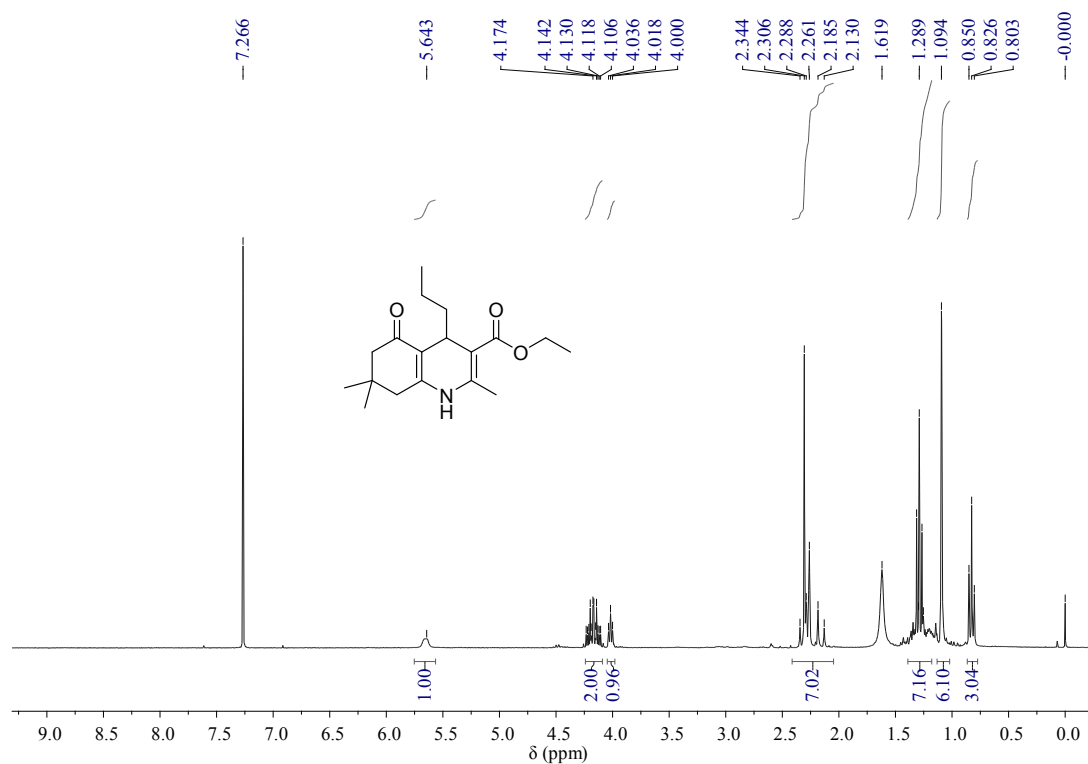

### Part 3 NMR spectrum for the products of Knoevenagel condensation

21.  $^1\text{H}$  NMR spectrum of ethyl (*E*)-2-cyano-3-phenylacrylate (**5a**)

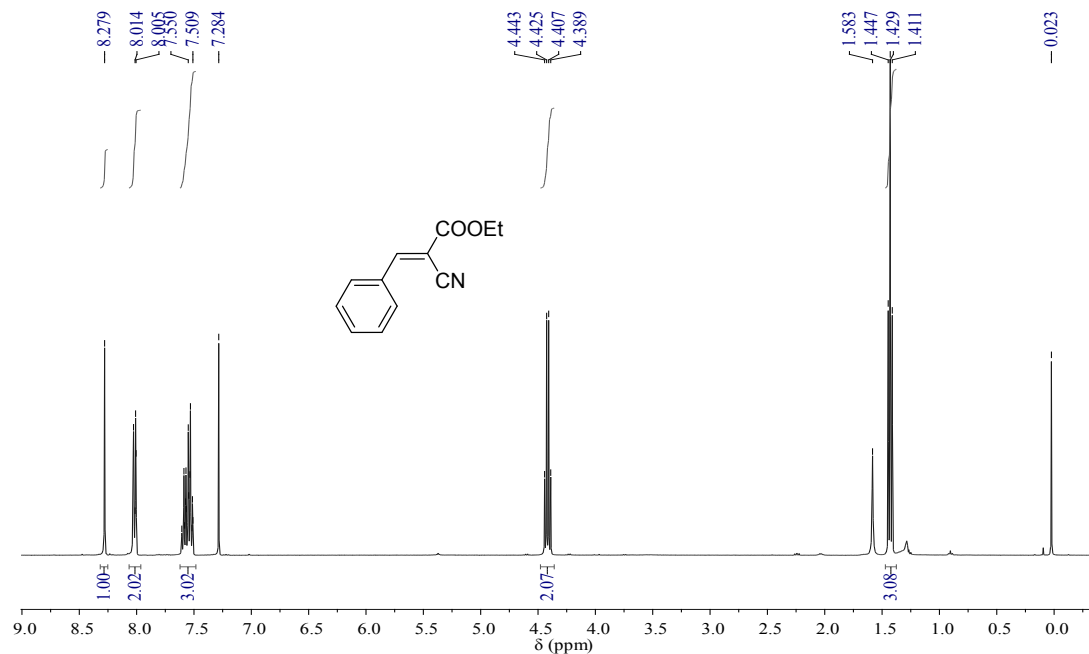

22.  $^1\text{H}$  NMR spectrum of ethyl (*E*)-2-cyano-3-(4-nitrophenyl)acrylate (**5b**)

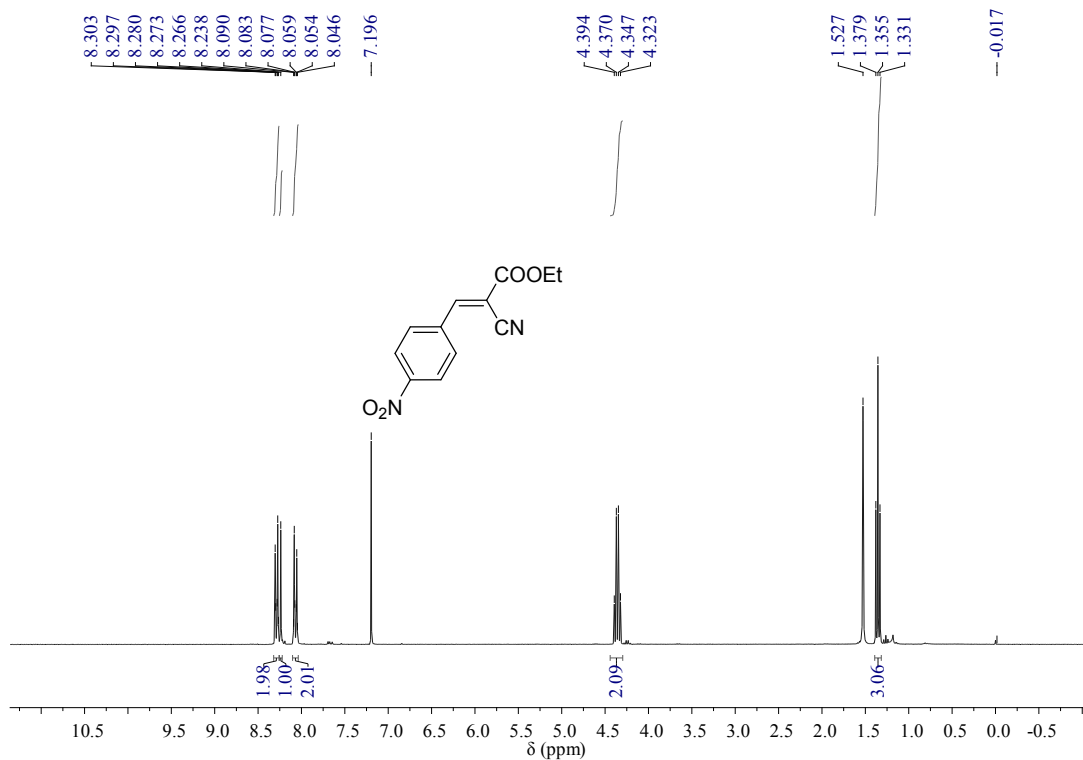

23.  $^1\text{H}$  NMR spectrum of ethyl (*E*)-2-cyano-3-(3-nitrophenyl)acrylate (**5c**)

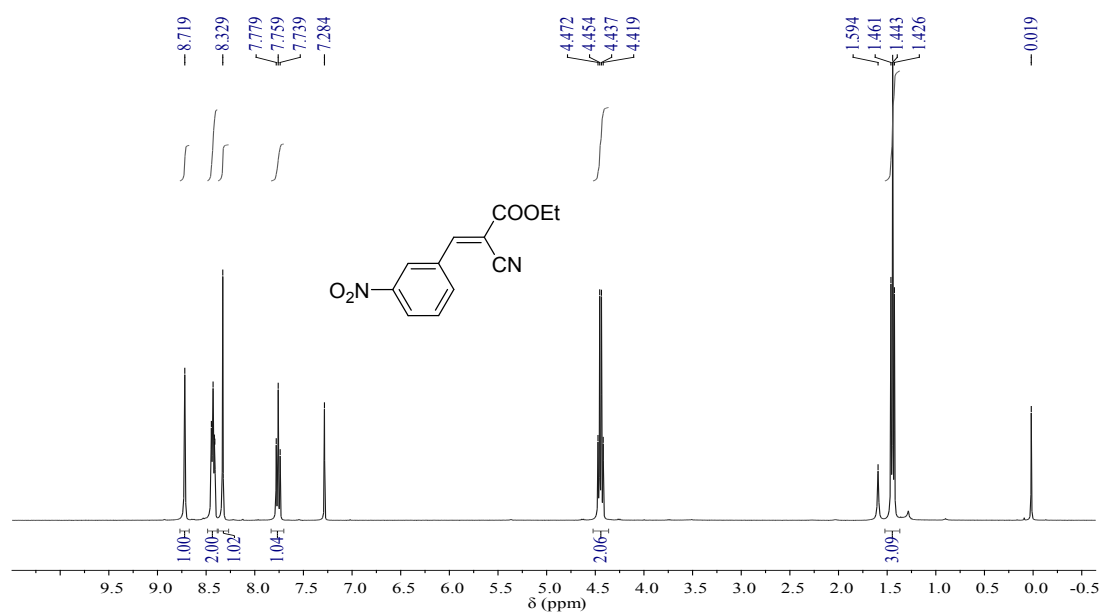

24.  $^1\text{H}$  NMR spectrum of ethyl (*E*)-3-(4-chlorophenyl)-2-cyanoacrylate (**5d**)

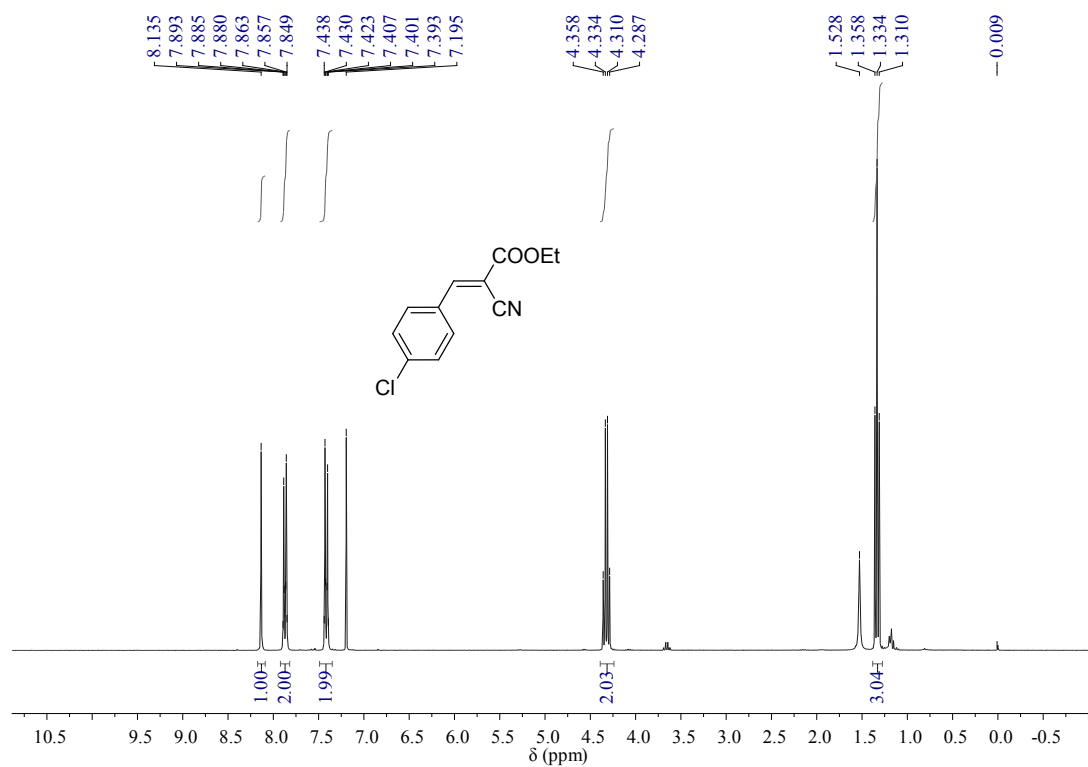

25.  $^1\text{H}$  NMR spectrum of ethyl (*E*)-2-cyano-3-(4-fluorophenyl)acrylate (**5e**)

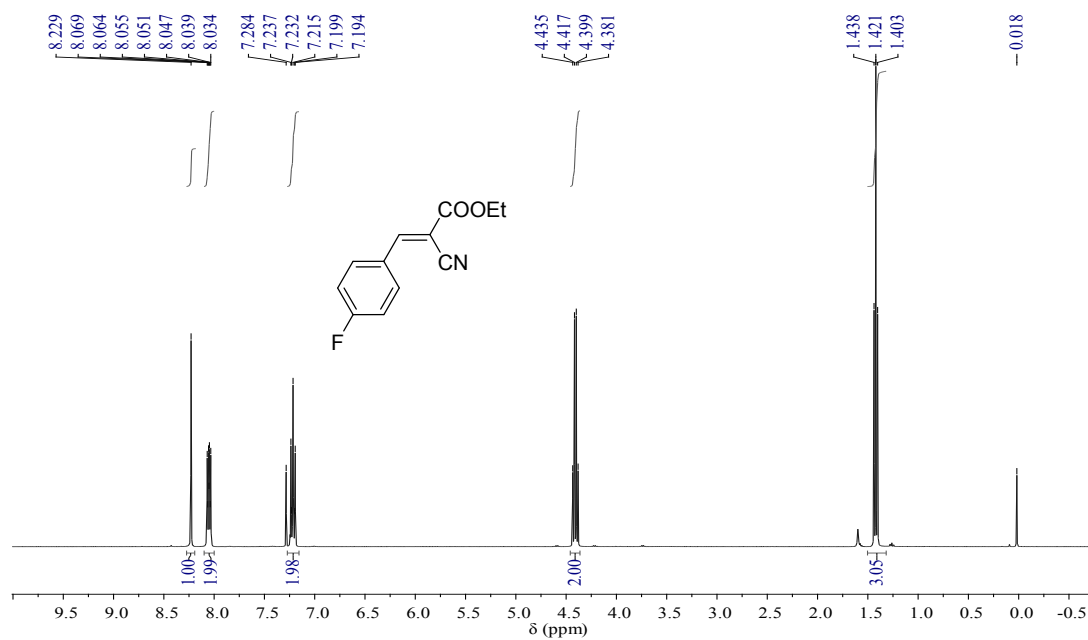

26.  $^1\text{H}$  NMR spectrum of ethyl (*E*)-3-(4-bromophenyl)-2-cyanoacrylate (**5f**)

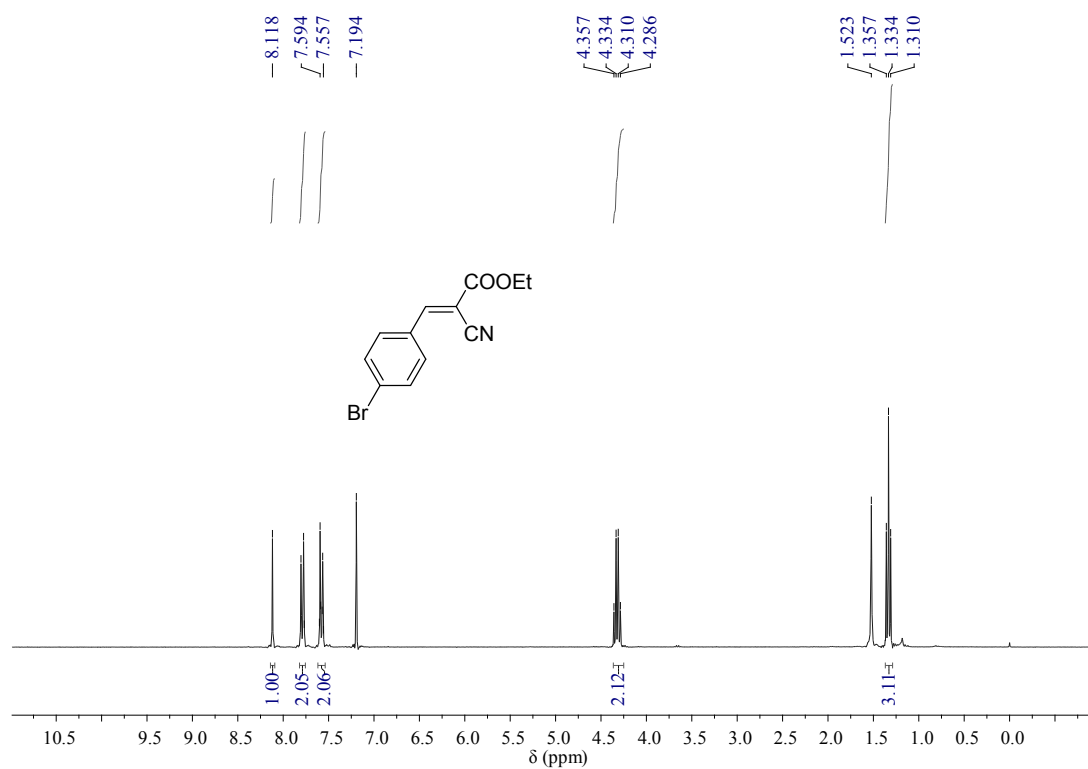

27. <sup>1</sup>H NMR spectrum of ethyl (*E*)-2-cyano-3-(*p*-tolyl)acrylate (**5g**)

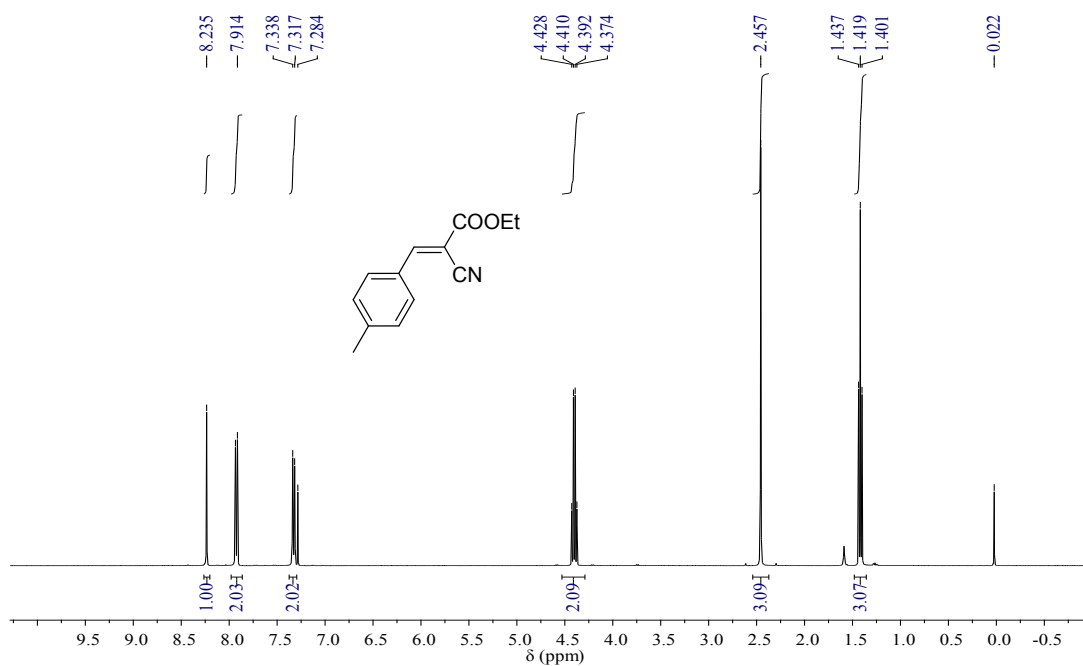

28. <sup>1</sup>H NMR spectrum of ethyl (*E*)-2-cyano-3-(4-hydroxy-3-methoxyphenyl)acrylate (**5h**)

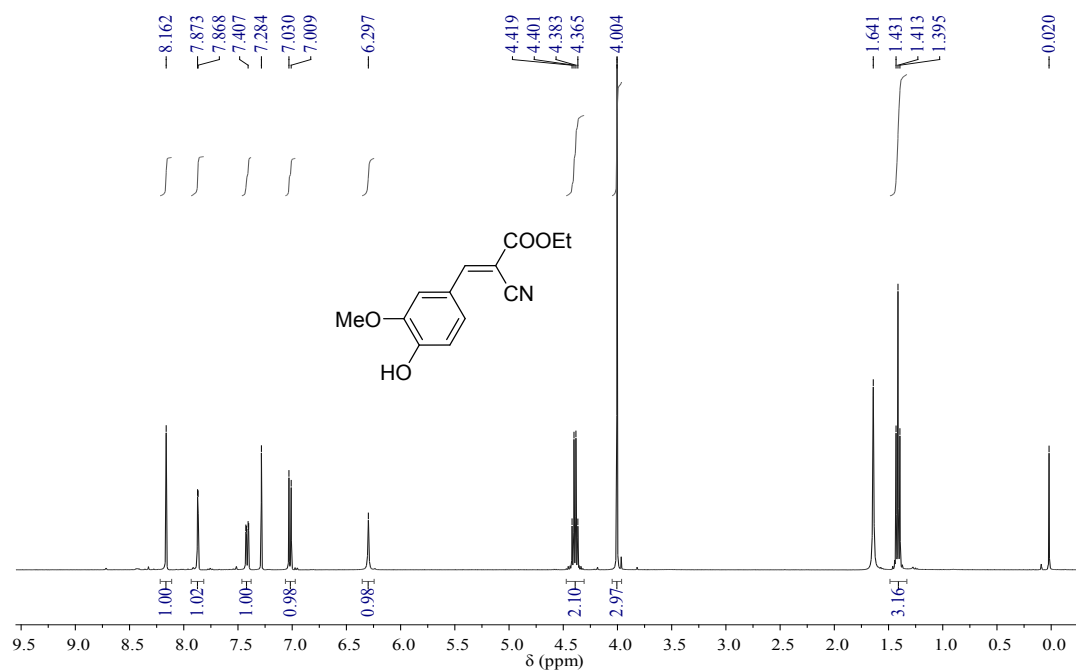

29. <sup>1</sup>H NMR spectrum of ethyl (*E*)-2-cyano-3-(furan-2-yl)acrylate (**5i**)

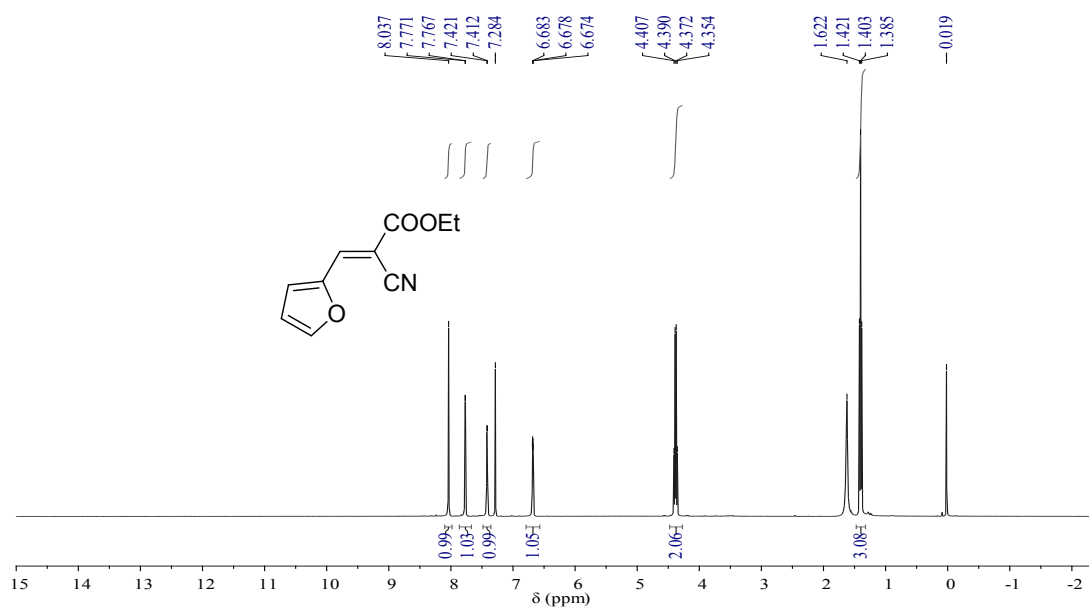

30. <sup>1</sup>H NMR spectrum of 2-benzylidenemalononitrile (**5j**)

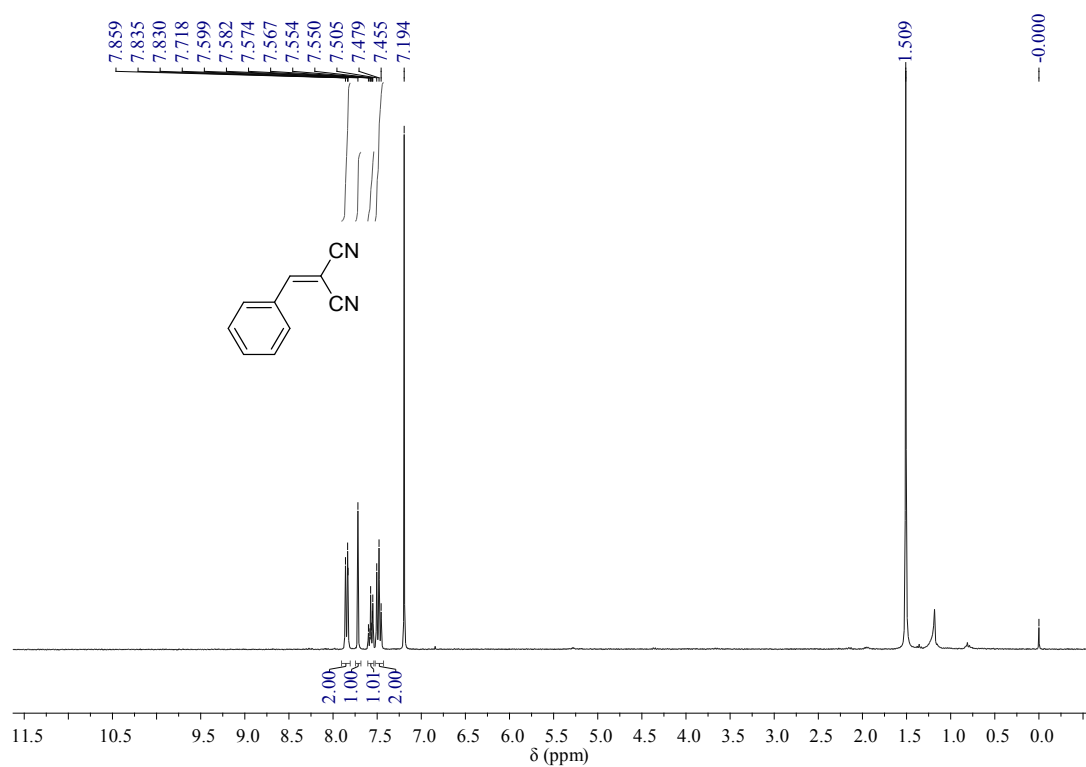



31.  $^1\text{H}$  NMR spectrum of 2-(3-nitrobenzylidene)malononitrile (**5k**)

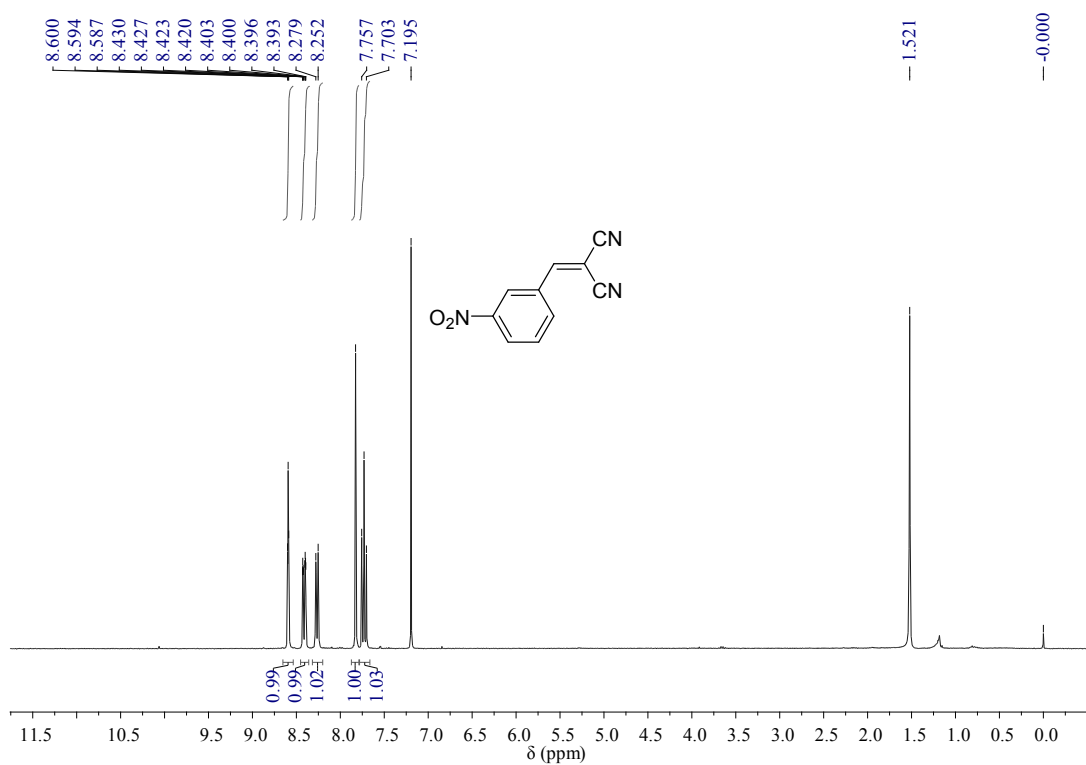

32.  $^1\text{H}$  NMR spectrum of 2-(4-Methoxybenzylidene)malononitrile (**5l**)

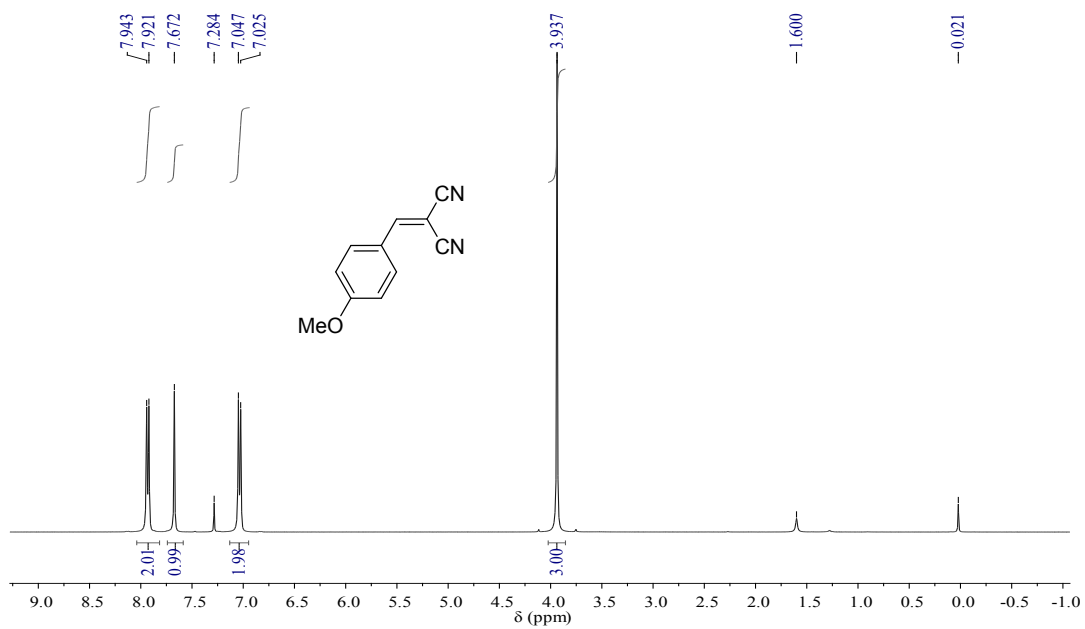

Supplement: c7ra10692k1.pdf [file c7ra10692k1.pdf]
